# Supplementary material for: A Novel Picornavirus Discovered in White Leg Shrimp Penaeus vannamei
Source: MDPI journal article supplement (doi:10.3390/v13122381), 2021-11-28
Supplement: s1 [file s1]

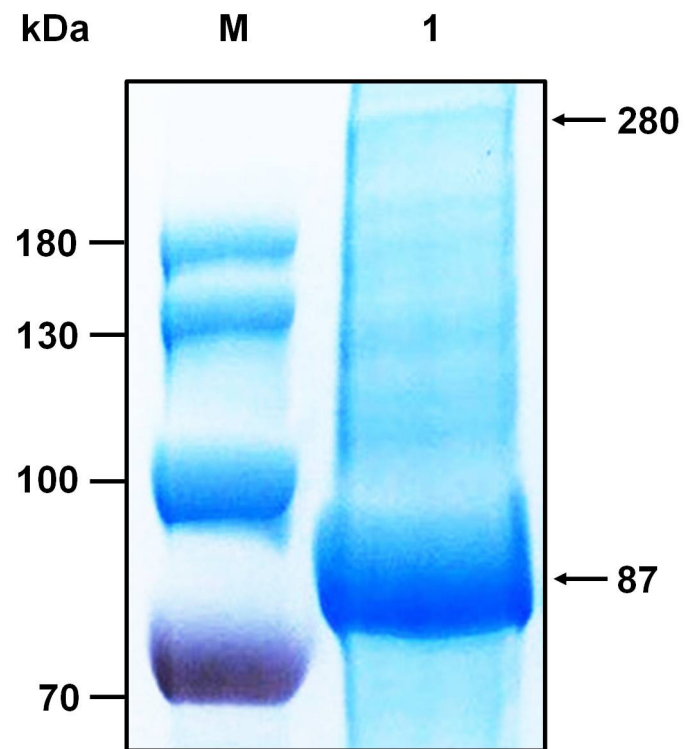

**Figure S1.** Identifying *PvPV* proteins by SDS-PAGE (6-8% gel). Lane M, molecular weight markers. Lane 1, the viral structural proteins of *PvPV*.

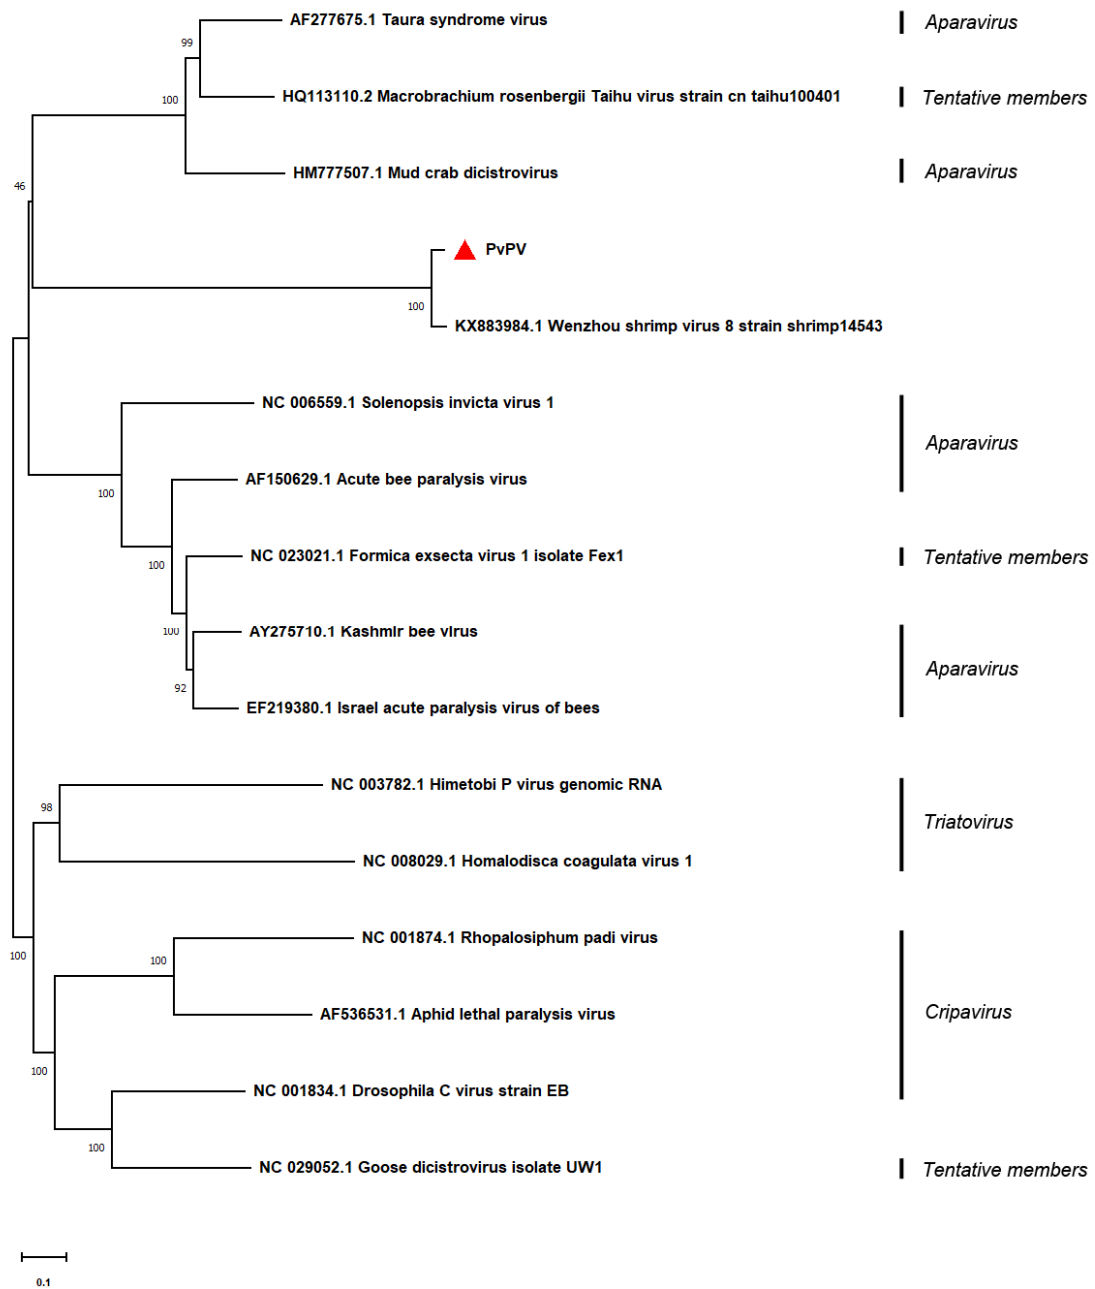

**Figure S2.** Phylogeny analysis of the genome sequences of *PvPV* and representative viruses in the family *Dicistroviridae*. The scale bar was 0.1.

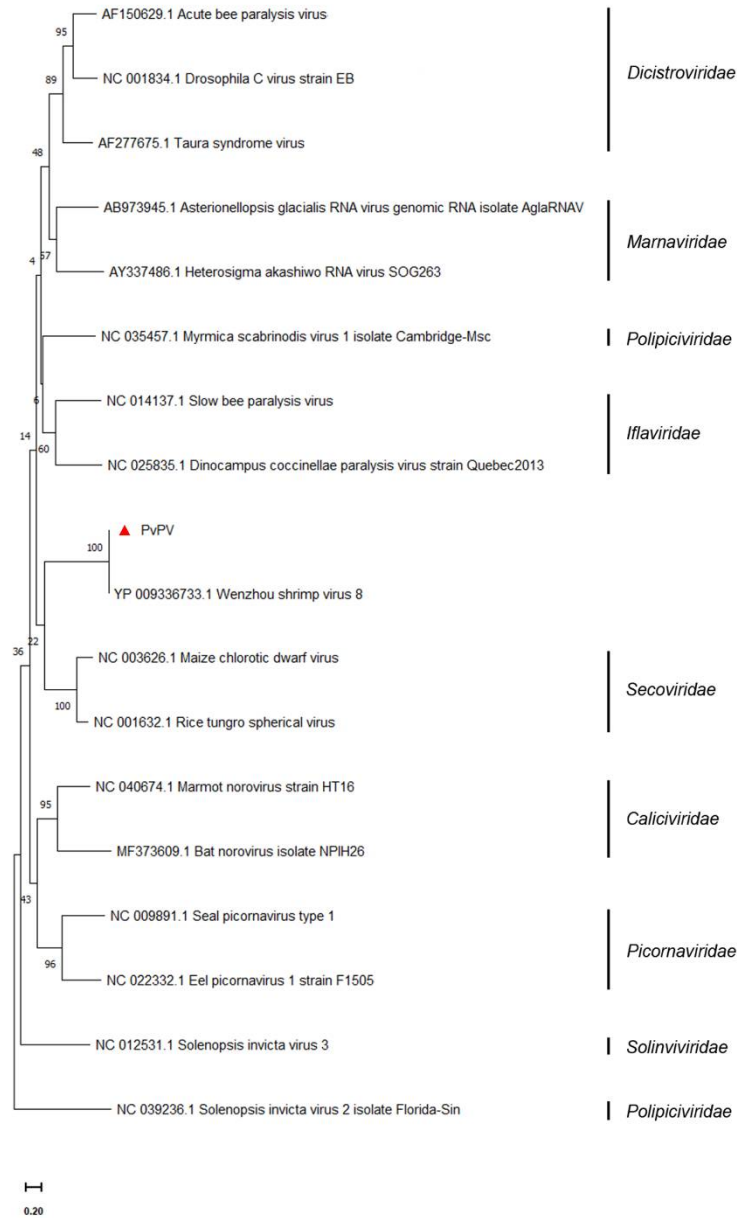

**Figure S3.** Phylogeny analysis of the deduced amino acid sequences of RNA-dependent RNA polymerase (RdRp) gene of *PvPV* and representative viruses in the order *Picornavirales*. The scale bar was 0.2.
